# Supplementary material for: Characterizing the Developmental Trajectory of Sirolimus Clearance in Neonates and Infants
Source: PubMed Central journal article supplement — CPT Pharmacometrics Syst Pharmacol. 2016 Aug 8;5(8):411–7. doi: 10.1002/psp4.12096 (PMC4999604; doi:10.1002/psp4.12096), 2016-08-08
Supplement: PSP4-5-411-s002.pdf [file PSP4-5-411-s002.pdf]

\$PROBLEM PK

\$INPUT C ID PMA DV

\$DATA Data.CSV IGNORE=C

\$PRED

CLMT=THETA(1)\*EXP(ETA(1)) ; CLMT= CLmatured, CL at fully matured level

TM50=THETA(2)\*EXP(ETA(2)) ; TM50, postmenstrual age (PMA) at which CL is half of CLmatured

SF=THETA(3)\*EXP(ETA(3)) ; SF= Hill

EFF=CLMT\*PMA\*\*SF/(TM50\*\*SF+PMA\*\*SF)

TIME=PMA

TAD=PMA

SID=ID

IPRED = EFF

Y = EFF + EFF\*ERR(1)

\$THETA

(10, 17, 25) ; CLMT= CLmatured, CL at fully matured level

(40, 60, 80) ; TM50, postmenstrual age at which CL is half of CLmatured

(0, 3, 10) ; SF=Hill

\$OMEGA

(0.1) ; CLMT= CLmatured, CL at fully matured level

(0.1) ; TM50, postmenstrual age at which CL is half of CLmatured

(0.3) ; SF=Hill

\$SIGMA

(0.2) ; Proportional error

\$EST METHOD=1 INTER MAXEVAL=2000 NOABORT SIG=3 PRINT=1 POSTHOC

\$COV
